# Supplementary material for: Raman spectroscopic features of primary cardiac microvascular endothelial cells (CMECs) isolated from the murine heart
Source: Royal Society of Chemistry journal article supplement (doi:10.1039/c8an01308j), 2018-01-01
Supplement: c8an01308j1.pdf [file c8an01308j1.pdf]

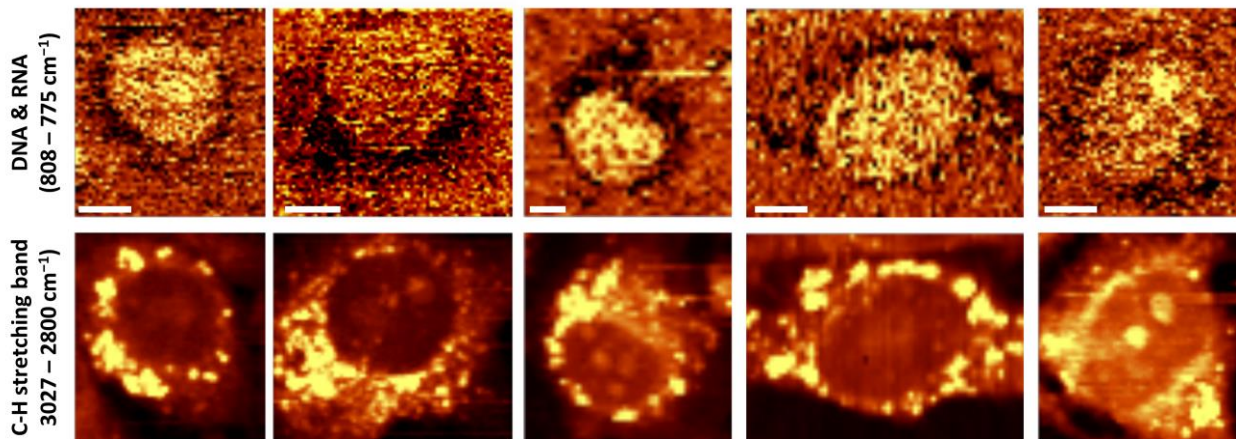

**Figure S1.** Distribution of DNA/ RNA and C-H stretching band in selected H5V cells generated by integration of Raman bands at 785 cm<sup>-1</sup> (ring breathing modes of the DNA/RNA bases) and in range 3027-2800 cm<sup>-1</sup> (C-H stretching bands), respectively. Scale bar on the images equals to 6  $\mu$ m.
